# Supplementary material
Source: publisher figshare collection journal article supplement (https://karger.figshare.com/ndownloader/files/12820259)
Supplement: Supplementary file 1 [file 12820259]

Table. Comparison between three treatment groups based on the actual follow-up data vs LOCF data

|  | Treatments and their contrasts | Actual follow-up | LOCF |
| --- | --- | --- | --- |
| PHQ-9 at week 9 | Continue (n=537) | 9.19 (6.00) | 9.48 (5.92) |
|  | Augment (n=526) | 8.10 (5.96) | 8.45 (5.98) |
|  | Switch (n=550) | 8.17 (5.84) | 8.54 (5.93) |
| ANOVA |  | F2,1610 = 5.64, p=0.0036 | F2,1610 = 4.95, p=0.0072 |
| Contrast (Scheffe) | Continue vs Augment | -1.09, p=0.012 | -1.03, p=0.019 |
|  | Continue vs Switch | -1.02, p=0.019 | -0.94, p=0.033 |
|  | Augment vs Switch | 0.07, p=0.98 | 0.09, p=0.97 |

ANOVA: Analysis of variance

LOCF: Last-observation-carried-forward

PHQ-9 : Patient Health Questionnaire-9
